# Supplementary material for: High comprehensive properties of colorless transparent polyimide films derived from fluorine-containing and ether-containing dianhydride
Source: Royal Society of Chemistry journal article supplement (doi:10.1039/d4ra05505e), 2024-01-01
Supplement: d4ra05505e1.pdf [file d4ra05505e1.pdf]

## Supporting Information

### High comprehensive properties of colorless transparent polyimide films derived from fluorine-containing and ether-containing dianhydride

Yan Shi <sup>#a</sup>, Jinzhi Hu <sup>#a</sup>, Xiaomin Li <sup>a,b</sup>, Jing Jian <sup>a</sup>, Lili Jiang <sup>a</sup>, Chuanqiang Yin <sup>\* a,b</sup>,  
Yuchun Xi <sup>b</sup>, Kai Huang <sup>a</sup>, Liejun Su <sup>a</sup>, Lang Zhou <sup>a,b</sup>

<sup>a</sup> Institute of Photovoltaics, Nanchang University, Nanchang 330031, P.R. China

<sup>b</sup> Institute of New Materials Technology, NCU-GQC Institute of PV-HE-ES Technology, Jiujiang 332020, P.R. China

\*Corresponding author: cqyin@ncu.edu.cn (C. Yin)

# These two authors contributed equally to this paper.

Table S1 XRD data and Free Volume Fraction of CPI Films

| Number | 2 $\theta$ (°) | <i>d</i> (Å) | FFV    |
|--------|----------------|--------------|--------|
| CPI-1  | 20.88          | 4.2494       | 0.2158 |
| CPI-2  | 20.79          | 4.2682       | 0.2353 |
| CPI-3  | 21.02          | 4.2215       | 0.2339 |
| CPI-4  | 18.53          | 4.7829       | 0.2480 |
| CPI-5  | 18.74          | 4.7290       | 0.2576 |
| CPI-6  | 16.36          | 5.4126       | 0.2552 |

Table S2 The Molecular Orbital Energies of HOMO, LUMO, and energy band gaps of CPI films.

| Number | BPADA | 6FDA | 6FDA loading (%) | $E_{\text{HUMO}}(\text{eV})$ | $E_{\text{LUMO}}(\text{eV})$ | $E_{\text{GAP}}(\text{eV})$ |
|--------|-------|------|------------------|------------------------------|------------------------------|-----------------------------|
| PI-1   | 3     | 0    | 0                | -5.7786                      | -2.3155                      | 3.4631                      |
| PI-2   | 2     | 1    | 33.33            | -6.3762                      | -2.8565                      | 3.5197                      |
| PI-3   | 1     | 2    | 66.67            | -6.5209                      | -2.8549                      | 3.6660                      |
| PI-4   | 0     | 3    | 100              | -6.8001                      | -2.9049                      | 3.8952                      |

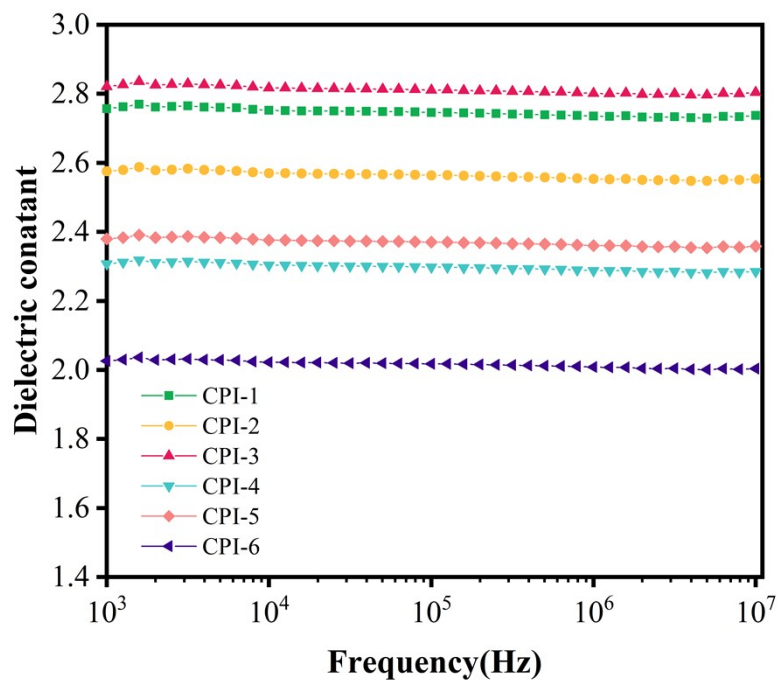

Fig. S1 Dielectric constants of CPI films from 1000 Hz to 10 MHz
